# Supplementary material
Source: Springer Nature journal article supplement (https://www.springermedizin.de/resource/supplementary/12936_2012_2439_MOESM1_ESM.pdf/9542652)
Supplement: MOESM1 [file 9542652]

|      |      |      |      |      |      |      |     |     |     |     |     |     |     |     |     |     |     |     |     |     |
|------|------|------|------|------|------|------|-----|-----|-----|-----|-----|-----|-----|-----|-----|-----|-----|-----|-----|-----|
| 1770 | 1780 | 1790 | 1800 | 1810 | 1820 |      |     |     |     |     |     |     |     |     |     |     |     |     |     |     |
| TTC  | TTT  | AGT  | TCA  | AAA  | AAT  | GAT  | AAC | AGT | CAT | ATT | ACC | AGT | ACA | TTG | AAT | GAA | AAT | GAT | AAG | AAT |
| F    | F    | S    | S    | K    | N    | D    | N   | S   | H   | I   | T   | S   | T   | L   | N   | E   | N   | D   | K   | N>  |
| 1830 | 1840 | 1850 | 1860 | 1870 | 1880 | 1890 |     |     |     |     |     |     |     |     |     |     |     |     |     |     |
| TTA  | AAG  | AAT  | GCT  | AAC  | CAT  | TCT  | AAT | TAT | ACT | ACA | GCT | CAG | GCA | ACA | ACA | AAT | GGA | TAT | GAA | GCT |
| L    | K    | N    | A    | N    | H    | S    | N   | Y   | T   | T   | A   | Q   | A   | T   | T   | N   | G   | Y   | E   | A>  |
| 1900 | 1910 | 1920 | 1930 | 1940 | 1950 |      |     |     |     |     |     |     |     |     |     |     |     |     |     |     |
| ATA  | GGA  | GAA  | AAT  | ACA  | TTT  | GAG  | CAT | GGC | ACA | AGT | TTT | GAA | AAT | TGT | TTC | CAC | TCA | AAA | TTG | GGT |
| I    | G    | E    | N    | T    | F    | E    | H   | G   | T   | S   | F   | E   | N   | C   | F   | H   | S   | K   | L   | G>  |

A623
